# Supplementary material for: CNGB3 Missense Variant Causes Recessive Achromatopsia in Original Braunvieh Cattle
Source: MDPI journal article supplement (doi:10.3390/ijms222212440), 2021-11-18
Supplement: s1 [file s1]

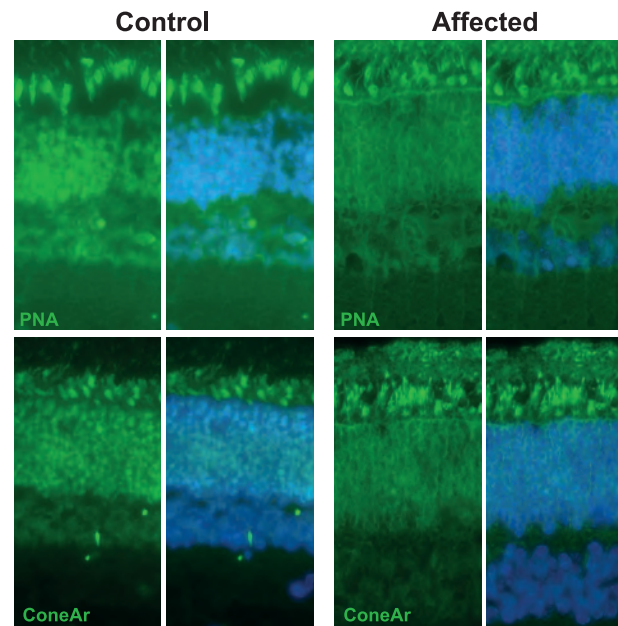

**Figure S1:** Immunostaining of cones markers in control and affected calf. PNA and CONE AR-RESTIN (ConeAr) are immunostained in both control and affected animals accordingly to conditions described in Table S2.
