# Supplementary material for: CNGB3 Missense Variant Causes Recessive Achromatopsia in Original Braunvieh Cattle
Source: MDPI journal article supplement (doi:10.3390/ijms222212440), 2021-11-18
Supplement: s1 [file s1]

**Table S2:** References of antibodies and immunostaining conditions used to detect retinal markers in a 5.5-month old achromatopsia-affected calf (case 12) and a control cattle.

| Antibody                   | Reference              | Species | Blocking condition                   | Dilution |
|----------------------------|------------------------|---------|--------------------------------------|----------|
| CNGB3                      | Biorbyt ORB658475      | Rabbit  | 10% NGS, 0.3% Triton / PBS ON at 4°C | 1/500    |
| GNAT2                      | SantaCruz SC-390       | Rabbit  | 10% NGS, 0.3% Triton / PBS ON at 4°C | 1/200    |
| ML-OPSIN                   | Sigma AB5405           | Rabbit  | 10% NGS, 0.3% Triton / PBS ON at 4°C | 1/2000   |
| S-OPSIN                    | SantaCruz SC-14363     | Goat    | 5% NDS, 0.1% Triton / PBS ON at 4°C  | 1/1000   |
| RHODOPSIN (RET-P1)         | Thermofisher MS-1233-P | Mouse   | 10% NGS, 0.3% Triton / PBS ON at 4°C | 1/500    |
| GNAT1                      | SantaCruz SC-389       | Rabbit  | 10% NGS, 0.3% Triton / PBS ON at 4°C | 1/1000   |
| PNA-FITC                   | Sigma L3766            | -       | 10% NGS, 0.3% Triton / PBS ON at 4°C | 1/1000   |
| CONE ARRESTIN              | Sigma 15282            | Rabbit  | 10% NGS, 0.3% Triton / PBS ON at 4°C | 1/10000  |
| Anti-rabbit AlexaFluor 488 | Invitrogen A11070      | Goat    | PBS 1h30 RT                          | 1/2000   |
| Anti-mouse AlexaFluor 488  | Invitrogen A21121      | Goat    | PBS 1h30 RT                          | 1/2000   |
| Anti-goat AlexaFluor 488   | Invitrogen A11055      | Donkey  | PBS 1h30 RT                          | 1/2000   |
