# Supplementary material for: CNGB3 Missense Variant Causes Recessive Achromatopsia in Original Braunvieh Cattle
Source: Int J Mol Sci. 2021 Nov 18;22(22):12440. doi: 10.3390/ijms222212440 (PMC8620519; doi:10.3390/ijms222212440)
Supplement: Supplementary file 1 [file ijms-22-12440-s001.zip]

Archive with 4 entries (4 files):
- FigureS1.pdf
- TableS1.xlsx
- TableS2.pdf
- VideoS1.mp4
