# Supplementary material for: CNGB3 Missense Variant Causes Recessive Achromatopsia in Original Braunvieh Cattle
Source: Int J Mol Sci. 2021 Nov 18;22(22):12440. doi: 10.3390/ijms222212440 (PMC8620519; doi:10.3390/ijms222212440)
Supplement: Supplementary file 1 [file ijms-22-12440-s001.zip › TableS1.xlsx]

## Sheet: TableS1
Chr	Marker	Position (ARS-UCD1.2)	case 1 (RM1116)	case 2 (RM1118)	case 3 (RM1890)	case 4 (RM2179)	case 5 (RM2898)	case 6 (RM2899)	case 7 (RM2900)	case 8 (RM2901)	case 9 (RM2957)	case 10 (RM3732)	case 11 (RM3733)	case 12 (RM3426)
				WGS 18.5x (SAMEA4644768)	WGS 18.1x (SAMEA6528889)	WGS 23.6x (SAMEA6528891)								ophthalmological examination
				ophthalmological examination, ZNS Pathology										electroretinography
14	ARS-BFGL-NGS-119102	67660678	AA	AA	AA	AA	AA	0	AA	AB	AA	AB	AA	AA
14	ARS-BFGL-NGS-114823	67751963	BB	BB	BB	BB	BB	0	BB	BB	BB	BB	BB	BB
14	BovineHD1400019701	67788453	AA	AA	AA	AA	AA	AA	AA	AA	AA	AA	AA	AA
14	BovineHD1400019730	67953739	BB	BB	BB	BB	BB	0	BB	BB	BB	BB	BB	BB
14	BovineHD1400019750	68048732	AA	AA	AB	AB	AA	AA	AA	AB	AA	AB	AB	AA
14	ARS-BFGL-BAC-19878	68072760	BB	BB	BB	BB	BB	BB	BB	BB	BB	BB	BB	BB
14	ARS-BFGL-BAC-23087	68125198	BB	BB	AB	BB	BB	0	BB	BB	BB	BB	BB	BB
14	BovineHD1400019775	68161877	BB	BB	BB	BB	BB	0	BB	AB	BB	AB	BB	BB
14	BovineHD1400019798	68285936	BB	BB	AB	BB	BB	BB	BB	AB	BB	AB	AB	BB
14	ARS-BFGL-NGS-104909	68422218	BB	BB	BB	BB	BB	0	BB	AB	BB	AB	AB	BB
14	BovineHD1400019890	68649845	BB	BB	BB	AB	BB	0	BB	AB	BB	AB	AB	BB
14	BovineHD1400019896	68671621	AA	AA	AA	AB	AA	AA	AA	AA	AA	AA	AA	AB
14	UA-IFASA-4785	68753847	AA	AA	AA	AA	AA	AA	AA	AA	AA	AA	AA	AA
14	Hapmap24788-BTA-109508	68912466	AA	AA	AA	AB	AA	0	AA	AB	AA	AB	AB	AA
14	ARS-BFGL-BAC-26290	68970241	BB	BB	BB	BB	BB	0	BB	BB	BB	BB	BB	BB
14	BovineHD1400019993	69034615	AA	AA	AA	AB	AA	AA	AA	AA	AA	AA	AA	AA
14	ARS-BFGL-NGS-1433	69092569	AA	AA	AB	AB	AA	AA	AA	AA	AA	AA	AA	AA
14	BovineHD1400020013	69107254	BB	BB	AB	BB	BB	BB	BB	AB	BB	AB	AB	BB
14	BovineHD1400020074	69290485	BB	BB	AB	BB	BB	BB	BB	AB	BB	AB	AB	BB
14	BovineHD1400020076	69300166	BB	BB	BB	BB	BB	0	BB	BB	BB	BB	BB	BB
14	BovineHD1400020087	69342584	BB	BB	BB	BB	BB	BB	BB	BB	BB	BB	BB	BB
14	BovineHD1400020111	69425676	AA	AA	AB	AA	AA	0	AA	AB	AA	AB	AA	AA
14	ARS-BFGL-NGS-60065	69474846	BB	BB	BB	BB	BB	0	BB	AB	BB	AB	AB	BB
14	BovineHD1400020164	69609532	AA	AA	AA	AA	AA	0	AA	AB	AA	AB	AA	AA
14	BovineHD1400020191	69707484	BB	BB	BB	BB	BB	BB	BB	BB	BB	BB	BB	BB
14	BovineHD1400020196	69761251	AA	AA	AB	AA	AA	AA	AA	AA	AA	AA	AB	AA
14	ARS-BFGL-NGS-31489	69787949	AA	AA	AB	AA	AA	0	AA	AA	AA	AA	AB	AA
14	BovineHD1400020268	70051056	AA	AA	AA	AB	AA	AA	AA	AA	AA	AA	AA	AA
14	ARS-BFGL-NGS-6536	70062876	BB	BB	BB	BB	BB	BB	BB	AB	BB	AB	AB	BB
14	BovineHD1400020282	70092837	AA	AA	AB	AA	AA	AA	AA	AB	AA	AB	AA	AA
14	ARS-BFGL-NGS-27908	70171559	AA	AA	AA	AB	AA	0	AA	AA	AA	AA	AB	AA
14	BovineHD1400020316	70191619	BB	BB	BB	AB	BB	0	BB	BB	BB	BB	AB	BB
14	BovineHD1400020317	70193457	BB	BB	BB	AB	BB	0	BB	BB	BB	BB	AB	BB
14	BovineHD1400020367	70311049	BB	BB	BB	BB	BB	0	BB	AB	BB	AB	BB	BB
14	ARS-BFGL-NGS-113054	70377378	BB	BB	BB	BB	BB	BB	BB	AB	BB	AB	BB	0
14	ARS-BFGL-NGS-118967	70580770	BB	BB	BB	BB	BB	BB	BB	BB	BB	BB	BB	BB
14	BovineHD1400020441	70596091	BB	BB	BB	BB	BB	0	BB	BB	BB	BB	BB	BB
14	Hapmap32361-BTA-155525	70840023	BB	BB	BB	BB	BB	0	BB	BB	BB	BB	AB	BB
14	ARS-BFGL-NGS-68191	70899906	BB	BB	BB	BB	BB	0	BB	BB	BB	BB	BB	BB
14	ARS-BFGL-NGS-55517	70926569	BB	BB	BB	BB	BB	0	BB	BB	BB	BB	BB	BB
14	BovineHD1400020558	70977497	AA	AA	AB	AA	AA	AA	AA	AA	AA	AA	AA	AA
14	Hapmap51548-BTA-109652	71084494	AA	AA	AB	AA	AA	0	AA	AA	AA	AA	AA	AA
14	BovineHD1400020605	71111881	BB	BB	AB	BB	BB	BB	BB	AB	BB	AB	BB	BB
14	BovineHD1400020626	71181480	AA	AA	AB	AA	AA	AA	AA	AA	AA	AA	AA	AA
14	BovineHD1400020653	71262179	BB	BB	AB	BB	BB	BB	BB	AB	BB	AB	BB	BB
14	BovineHD1400020665	71304444	BB	BB	BB	BB	BB	BB	BB	BB	BB	BB	BB	BB
14	BovineHD1400020684	71418173	BB	BB	BB	BB	BB	BB	BB	BB	BB	BB	BB	BB
14	Hapmap54796-rs29014519	71616232	AA	AA	AB	AA	AA	AA	AA	AB	AA	AB	AA	AA
14	ARS-BFGL-NGS-12514	71654784	BB	BB	BB	BB	BB	BB	BB	BB	BB	BB	BB	BB
14	UA-IFASA-8614	71696822	AA	AA	AA	AA	AA	AA	AA	AB	AA	AB	AA	AA
14	BovineHD1400020801	71794539	BB	BB	BB	BB	BB	0	BB	AB	BB	AB	BB	BB
14	BovineHD1400020835	71896665	BB	BB	AB	BB	BB	BB	BB	AB	BB	AB	BB	BB
14	BovineHD1400020836	71906970	BB	BB	BB	BB	BB	BB	BB	BB	BB	BB	BB	BB
14	BovineHD1400020849	71976185	BB	BB	BB	BB	BB	0	BB	AB	BB	AB	BB	BB
14	BovineHD1400020863	72039719	BB	BB	BB	BB	BB	BB	BB	BB	BB	BB	BB	BB
14	Hapmap41395-BTA-97523	72161715	AA	AA	AB	AA	AA	AA	AA	AA	AA	AA	AA	AA
14	BovineHD1400020899	72219649	AA	AA	AB	AA	AA	0	AA	AA	AA	AA	AA	AA
14	UA-IFASA-9661	72225820	AA	AA	AB	AA	AA	AA	AA	AA	AA	AA	AA	AA
14	BovineHD1400020940	72336371	AA	AA	AB	AA	AA	AA	AA	AA	AA	AA	AA	AA
14	BovineHD1400020962	72403376	AA	AA	AB	AA	AA	AA	AA	AB	AA	AB	AA	AA
14	BovineHD1400020983	72440884	BB	BB	AB	BB	BB	BB	BB	BB	BB	BB	BB	BB
14	Hapmap50329-BTA-35492	72657447	BB	BB	BB	BB	BB	0	BB	BB	0	BB	BB	BB
14	BovineHD1400021109	72881444	AA	AA	AA	AA	AA	AA	AA	AA	AA	AA	AA	AA
14	BovineHD1400021125	72925085	BB	BB	AB	BB	BB	0	BB	BB	BB	BB	BB	BB
14	Hapmap52494-rs29015005	72944727	AA	AA	AA	AA	AA	AA	AA	AA	AA	AA	AA	AA
14	BovineHD1400021160	73130508	AA	AA	AA	AA	AA	0	AA	AA	AA	AA	AA	AA
14	UA-IFASA-5711	73182590	AA	AA	AA	AA	AA	0	AA	AA	AA	AA	AA	AA
14	BovineHD1400021214	73235969	AA	AA	AA	AA	AA	0	AA	AA	AA	AA	AA	AA
14	ARS-BFGL-NGS-112763	73496750	AA	AA	AB	AA	AA	0	AA	AB	AA	AB	AA	AA
14	ARS-BFGL-BAC-23724	73629557	AA	AA	AA	AA	AA	0	AA	AA	AA	AA	AA	0
14	UA-IFASA-7973	73708561	AA	AA	AA	AA	AA	0	AA	AA	AA	AA	AA	AA
14	ARS-BFGL-NGS-42005	73814641	AA	AA	AB	AA	AA	0	AA	AA	AA	AA	AA	AA
14	BovineHD1400021397	73937270	BB	BB	BB	BB	BB	BB	BB	BB	BB	BB	BB	BB
14	BovineHD1400021412	73987246	BB	BB	AB	BB	BB	BB	BB	AB	BB	AB	BB	BB
14	ARS-BFGL-NGS-13904	74015277	BB	BB	BB	BB	BB	BB	BB	BB	BB	BB	BB	BB
14	BovineHD1400021444	74125864	AA	AA	AB	AA	AA	0	AA	AA	AA	AA	AA	AA
14	BovineHD1400021451	74146075	AA	AA	AB	AA	AA	AA	AA	AA	AA	AA	AA	AA
14	BovineHD1400021466	74199868	AA	AA	AB	AA	AA	0	AA	AA	AA	AA	AA	AA
14	BovineHD1400021491	74306245	AA	AA	AB	AA	AA	AA	AA	AA	AA	AB	AA	AA
14	BovineHD1400021514	74457160	BB	BB	BB	BB	BB	BB	BB	BB	BB	BB	BB	BB
14	ARS-BFGL-BAC-23729	74469767	BB	BB	BB	BB	BB	BB	BB	BB	BB	BB	BB	BB
14	BovineHD1400024564	74499951	BB	BB	BB	BB	BB	BB	BB	BB	BB	BB	BB	BB
14	Hapmap43459-BTA-111191	74666152	AA	AA	AA	AA	AA	0	AA	AA	0	AA	AA	AA
14	BovineHD1400021618	74754518	AA	AA	AA	AA	AA	AA	AA	AA	AA	AA	AA	AA
14	BovineHD1400021633	74785667	AA	AA	AA	AA	AA	AA	AA	AA	AA	AA	AA	AA
14	Hapmap38269-BTA-100162	74816570	BB	BB	BB	BB	BB	BB	BB	BB	BB	BB	BB	BB
14	BTA-116518-no-rs	74887386	BB	BB	BB	BB	BB	0	BB	BB	BB	BB	BB	BB
14	ARS-BFGL-NGS-16144	74919196	AA	AA	AA	AA	AA	0	AA	AA	AA	AA	AA	AA
14	BovineHD1400021729	75086307	BB	BB	BB	BB	BB	BB	BB	BB	BB	BB	BB	BB
14	Hapmap58971-rs29019251	75097166	AA	AA	AA	AA	AA	AA	AA	AA	AA	AA	AA	AA
14	UA-IFASA-6510	75468957	BB	BB	BB	BB	BB	BB	BB	BB	BB	BB	BB	BB
14	BTB-00576713	75515790	BB	BB	BB	BB	BB	0	BB	BB	BB	BB	BB	BB
14	BTB-01242944	75629300	BB	BB	BB	BB	BB	0	BB	BB	BB	BB	BB	BB
14	BovineHD1400021867	75692160	BB	BB	BB	BB	BB	BB	BB	BB	BB	BB	BB	BB
14	BTB-00853404	75782925	BB	BB	BB	BB	BB	0	BB	BB	BB	BB	BB	BB
14	BovineHD1400021903	75864295	BB	BB	BB	BB	BB	BB	BB	BB	BB	BB	BB	BB
14	BovineHD1400021917	75913436	AA	AA	AA	AA	AA	AA	AA	AA	AA	AA	AA	AA
14	BovineHD1400021919	75921425	AA	AA	AA	AA	AA	AA	AA	AA	AA	AA	AA	AA
14	ARS-BFGL-NGS-67896	75989538	BB	BB	BB	BB	BB	0	BB	BB	BB	BB	BB	BB
14	BovineHD1400021997	76116818	AA	AA	AA	AA	AA	AA	AA	AA	AA	AA	AA	AA
14	BovineHD1400022023	76162175	AA	AA	AA	AA	AA	AA	AA	AA	AA	AA	AA	AA
14	BovineHD1400022070	76365493	AA	AA	AA	AA	AA	AA	AA	AA	AA	AA	AA	AA
14	BovineHD1400022087	76427713	BB	BB	BB	BB	BB	BB	BB	BB	BB	BB	BB	BB
14	UA-IFASA-9421	76470458	AA	AA	AA	AA	AA	AA	AA	AA	AA	AA	AA	AA
14	BTA-121000-no-rs	76496799	BB	BB	BB	BB	BB	0	BB	BB	BB	BB	BB	BB
14	BovineHD1400022110	76510739	BB	BB	BB	BB	BB	0	BB	BB	BB	BB	BB	BB
14	BovineHD1400022140	76576371	BB	BB	BB	BB	BB	BB	BB	BB	BB	BB	BB	BB
14	ARS-BFGL-NGS-61550	76800429	BB	BB	BB	BB	BB	0	BB	BB	BB	BB	BB	AB
14	BovineHD1400022284	77007398	AA	AA	AA	AA	AA	AA	AA	AA	AA	AA	AA	AB
14	Hapmap57268-ss46526401	77033866	BB	BB	BB	BB	BB	0	BB	BB	BB	BB	BB	AB
14	BovineHD1400022334	77148286	BB	BB	BB	BB	BB	0	BB	BB	BB	BB	BB	AB
14	BovineHD1400022372	77295953	AA	AA	AA	AA	AA	0	AA	AA	AA	AA	AA	AB
14	BovineHD1400022377	77311622	AA	AA	AA	AA	AA	AA	AB	AA	AA	AA	AA	AB
14	ARS-BFGL-NGS-75368	77353709	BB	BB	BB	BB	BB	0	BB	BB	BB	BB	BB	BB
14	BovineHD1400022406	77400196	BB	BB	BB	BB	BB	0	BB	BB	BB	BB	BB	BB
14	BovineHD1400022447	77484555	AA	AA	AA	AA	AA	AA	AA	AA	AA	AA	AA	AA
14	ARS-USDA-AGIL-chr14-79885274-000261	77523163	BB	BB	BB	BB	BB	BB	BB	BB	BB	BB	BB	BB
14	BovineHD1400022462	77531189	BB	BB	BB	BB	BB	BB	AB	BB	BB	BB	BB	BB
14	BovineHD1400022466	77548907	BB	BB	BB	BB	BB	BB	AB	BB	BB	BB	BB	BB
14	UA-IFASA-9372	77610361	BB	BB	BB	BB	BB	BB	AB	BB	BB	BB	BB	BB
14	BovineHD1400022521	77708900	AA	AA	AA	AA	AA	AA	AA	AA	0	AA	AA	AB
14	ARS-USMARC-Parent-DQ846692-rs29010281	77723052	BB	BB	BB	BB	BB	BB	BB	BB	BB	BB	BB	AB
14	BovineHD1400022545	77788111	AA	AA	AA	AA	AA	AA	AA	AA	AA	AA	AA	AB
14	ARS-BFGL-NGS-111567	77817440	BB	BB	BB	BB	BB	0	AB	BB	BB	BB	BB	AB
14	BovineHD1400022583	77905168	AA	AA	AA	AA	AA	AA	AA	AA	AA	AA	AA	AA
14	BovineHD1400022657	78088713	AA	AA	AA	AA	AA	AA	AB	AA	AA	AA	AA	0
14	ARS-BFGL-NGS-32581	78091832	BB	BB	BB	BB	BB	BB	AB	BB	BB	BB	BB	BB
14	ARS-BFGL-NGS-42421	78114461	BB	BB	BB	BB	BB	0	BB	BB	BB	BB	BB	BB
14	BovineHD1400022681	78130141	BB	BB	BB	BB	BB	BB	BB	BB	BB	BB	BB	BB
14	BovineHD1400022702	78169990	AA	AA	AA	AA	AA	AA	AB	AA	AA	AA	AA	AB
14	ARS-BFGL-NGS-8596	78189730	BB	BB	BB	BB	BB	0	BB	BB	BB	BB	BB	BB
14	BovineHD1400022720	78219649	AA	AA	AA	AA	AA	AA	AA	AA	AA	AA	AA	AB
14	BovineHD1400022727	78235444	AA	AA	AA	AA	AA	0	AB	AA	AA	AA	AA	AA
14	ARS-BFGL-NGS-20322	78278473	BB	BB	BB	BB	BB	BB	BB	BB	BB	BB	BB	BB
14	BovineHD1400022797	78362323	AA	AA	AA	AA	AA	0	AB	AA	AA	AA	AA	AA
14	BovineHD1400022814	78396989	BB	BB	BB	BB	BB	0	AB	BB	BB	BB	BB	AB
14	BovineHD1400022890	78583851	BB	BB	BB	BB	BB	0	BB	BB	BB	BB	BB	AB
14	ARS-BFGL-BAC-26943	78632183	AA	AA	AA	AA	AA	0	AB	AA	AA	AA	AA	AA
14	BTA-73850-no-rs	78666756	BB	BB	BB	BB	BB	0	BB	BB	BB	BB	BB	BB
14	BovineHD1400022941	78747146	AA	AA	AA	AA	AA	0	AA	AA	AA	AA	AA	AA
14	Hapmap29628-BTA-158324	78824809	AA	AA	AA	AA	AA	AA	AB	AA	AA	AA	AA	AA
14	BovineHD1400022973	78907605	AA	AA	AA	AA	AA	AA	AA	AA	AA	AA	AA	AA
14	BovineHD1400023043	79153710	AA	AA	AA	AB	AA	AA	AB	AA	AA	AA	AA	AB
14	BovineHD1400023084	79334303	BB	BB	BB	AB	BB	BB	BB	BB	BB	BB	BB	BB
14	ARS-BFGL-BAC-18907	79486263	AA	AA	AA	AA	AA	0	AA	AA	AA	AA	AA	AA
14	BovineHD1400023134	79551229	BB	BB	BB	AB	BB	0	BB	BB	BB	BB	BB	AA
14	BovineHD1400023138	79567682	AA	AA	AA	AB	AA	0	AA	AA	AA	AA	AA	BB
14	BovineHD1400023151	79607778	BB	BB	BB	BB	BB	0	AB	BB	BB	BB	BB	BB
14	BovineHD1400023196	79745346	BB	BB	BB	BB	BB	0	AB	BB	BB	BB	BB	AB
14	BovineHD1400023228	79827235	BB	BB	BB	AB	BB	BB	BB	BB	BB	BB	BB	BB
14	BovineHD1400023280	80019336	BB	BB	BB	BB	BB	0	AB	BB	BB	BB	BB	AB
14	BovineHD1400023316	80154063	BB	BB	AB	AB	BB	0	BB	BB	BB	BB	BB	BB
14	Hapmap39981-BTA-19748	80312936	0	BB	BB	AB	BB	0	BB	BB	BB	BB	BB	BB
14	BovineHD1400023348	80351297	BB	BB	AB	BB	BB	0	BB	BB	BB	BB	BB	AA
14	BovineHD1400024597	80383054	AA	AA	AA	AB	AA	AA	AA	AA	AA	AA	AA	BB
14	BovineHD1400023359	80414452	BB	BB	BB	AB	BB	BB	AB	BB	BB	BB	BB	BB
14	UA-IFASA-8924	80468154	AA	AA	AA	AB	AA	AA	AB	AA	AA	AA	AA	AA
14	BovineHD1400023411	80591202	AA	AA	AA	AB	AA	AA	AA	AA	AA	AA	AA	AB
14	Hapmap49062-BTA-122353	80615695	BB	BB	AB	AB	BB	BB	BB	BB	BB	BB	BB	AB
14	BovineHD1400023428	80657252	AA	AA	AA	AA	AA	AA	AB	AA	AA	AA	AA	AA
14	BovineHD1400023500	80837519	AA	AA	AB	AA	AA	0	AB	AA	AA	AA	AA	AB
14	Hapmap50331-BTA-35792	80877900	AA	AA	AA	AA	AA	0	AA	AA	AA	AA	AA	AA
14	BovineHD1400023521	80903600	AA	AB	AA	AA	AA	0	AB	AA	AA	AA	AA	AB
14	BovineHD1400023526	80919208	AA	AA	AB	AA	AA	0	AA	AA	AA	AA	AA	AB
14	BovineHD1400023546	80972286	BB	BB	BB	BB	BB	0	AB	BB	BB	BB	BB	BB
14	ARS-BFGL-NGS-18046	81126052	BB	AB	BB	AB	BB	BB	AB	BB	BB	BB	BB	AB
14	ARS-BFGL-NGS-58369	81335310	BB	BB	AB	BB	BB	BB	BB	BB	AB	BB	BB	BB
14	BovineHD1400023668	81339907	AA	AB	AA	AB	AA	AA	AA	AA	AA	AA	AA	AB
14	BovineHD4100011753	81344122	AA	AB	AA	AB	AA	0	AA	AA	AA	AA	AA	AB
14	BovineHD1400023674	81346650	AA	AA	AA	AA	AA	0	AA	AA	AA	AA	AA	AA
14	BovineHD1400023753	81538205	AA	AB	AB	AA	AA	AA	AA	AA	AA	AA	AA	AB
14	BovineHD1400023777	81593681	BB	BB	BB	AB	BB	0	BB	BB	BB	BB	BB	BB
14	BovineHD1400023785	81619566	AA	AA	AA	AA	AA	AA	AB	AA	AA	AA	AA	AA
14	BovineHD1400023811	81671741	AA	AB	AA	AA	AA	AA	AA	AA	AA	AA	AA	AB
14	BovineHD4100011762	81721236	BB	AB	BB	AB	BB	0	BB	BB	AB	BB	BB	AB
14	BovineHD1400023832	81726995	BB	BB	BB	AB	BB	0	BB	BB	AB	BB	BB	BB
14	ARS-BFGL-BAC-20179	81734635	BB	BB	BB	BB	BB	BB	BB	BB	BB	BB	BB	BB
14	Hapmap46990-BTA-35846	81809977	AA	AA	AA	AA	AA	AA	AA	AA	AA	AA	AA	AA
14	Hapmap57920-rs29025560	82006919	AA	AA	AA	AB	AA	0	AA	AA	AA	AA	AA	AA
14	BovineHD1400023972	82038193	AA	AA	AA	AA	AA	0	AA	AA	AB	AA	AA	AA
14	ARS-BFGL-NGS-26968	82055567	BB	BB	BB	AB	BB	0	BB	BB	BB	BB	BB	BB
14	BovineHD1400023988	82071742	AA	AB	AA	AB	AA	0	AA	AA	AA	AA	AA	AB
14	ARS-BFGL-BAC-18466	82123971	BB	BB	BB	BB	BB	0	BB	BB	BB	BB	BB	BB
14	BovineHD1400024012	82146414	AA	AB	AA	AB	AA	AA	AA	AA	AA	AA	AA	AB
14	Hapmap27423-BTA-150958	82172085	BB	BB	AB	BB	BB	BB	AB	BB	AB	BB	BB	BB
14	ARS-BFGL-NGS-100844	82213343	AA	AA	AA	AA	AA	0	AA	AA	AA	AA	AA	AA
14	BovineHD1400024192	82225051	BB	BB	BB	AB	BB	0	BB	BB	BB	BB	BB	BB
14	BovineHD1400024196	82247268	BB	BB	BB	BB	BB	BB	BB	BB	BB	BB	BB	BB
14	BovineHD1400021674	82365579	BB	AB	BB	BB	AA	BB	BB	AA	BB	AB	BB	AB
14	ARS-BFGL-NGS-36660	82366657	BB	AB	BB	BB	AA	0	BB	AB	BB	BB	BB	AB
